# Supplementary material
Source: Research Square preprint supplement (doi:10.21203/rs.3.rs-9358539/v1)
Supplement: Supplementary file 1 [file 9517c1f9d73a03aad8776b00.docx]

**Datasets
The Pedagogical and Discursive Functions of Teacher Code-Switching in Beni-Suef University EFL Classrooms**

**Coverage in this file:** participant profile, reconstructed observation-frequency tables, representative interactional corpus, teacher interview and stimulated-recall matrices, student questionnaire summary tables, focus-group themes, and institutional policy conflict matrix.

**1. Participant Profile and Study Coverage**

| Component | **Count** | **Description** |
| --- | --- | --- |
| Teacher participants | 4 | Omar and Sarah (Level 1), Khalid (Level 3), and Noura (Level 4), all from Beni-Suef University, Egypt. |
| Student participants | 100 | Evenly split between Level 1 (n=50) and Level 4 (n=50); treated as the core questionnaire sample. |
| Observed teacher code-switching episodes | 244 | Full coded observation corpus used for functional and discursive mapping. |
| Representative interactional episodes transcribed in detail | 20 | Illustrative episodes selected from the wider observation corpus for discourse-oriented analysis. |
| Teacher interviews | 4 | One semi-structured interview per teacher participant. |
| Stimulated-recall clips | 8 | Used to clarify teacher intention behind salient code-switching episodes. |
| Student focus groups | 600 | Six items answered by 100 student participants. |
| Likert responses | 500 | Five items answered by 100 student participants. |

**2. Reconstructed Observation Corpus**

The full observation corpus contained 244 coded teacher code-switching episodes. The following tables recreate the analytic frequency structure used in the study narrative, followed by the 20 representative interactional episodes.

**2.1 Functional Distribution Across the Full Observation Corpus**

| **Broad function cluster** | **Frequency (f)** | **Percentage** | **Interpretive note** |
| --- | --- | --- | --- |
| Knowledge-building | 146 | 60% | Grammar explanation, translation, metalinguistic comparison, vocabulary clarification, phonology, error repair, cultural grounding. |
| Management / regulation | 37 | 15% | Administrative clarity, compliance reminders, urgency, behavioral control. |
| Participation / agency support | 32 | 13% | Scaffolding, prompting, flexible response options, temporary suspension of English-only pressure. |
| Affective / relational work | 29 | 12% | Praise, solidarity, care, rapport, emotional reassurance. |
| Total | 244 | 100% | Full coded corpus. |

**2.2 Level-Oriented Observation Summary**

| **Instructional level / teacher cluster** | **Episodes** | **Key distribution pattern** | **Interpretive implication** |
| --- | --- | --- | --- |
| Level 1 (Omar & Sarah) | 156 | Approximately 75% of switches directed to knowledge-building and management. | Arabic functions as an authoritative anchor for basic comprehension, pacing, and control. |
| Level 3 (Khalid) | 48 | Around 70% of switches directed to metalinguistic comparison, semantic precision, and repair. | Arabic operates as a comparative bridge between systems. |
| Level 4 (Noura) | 40 | Around 60% of switches oriented to participation support or affective purposes. | Arabic is used to redistribute agency and protect participation rather than explain basics. |

**2.3 Representative Interactional Episodes (20 Episodes)**

| **Episode ID** | **Teacher** | **Level** | **Transcript fragment (CS bolded in source logs)** | **Pedagogical function** | **Discursive move** |
| --- | --- | --- | --- | --- | --- |
| OBS-001 | Omar | L1 | “The verb is went. Hatha fil-madhi. Is it clear?” | Grammar | Epistemic clarity |
| OBS-002 | Sarah | L1 | “Open your books. Yalla ya banat, asra’. We have a quiz.” | Management | Asserting urgency |
| OBS-003 | Khalid | L3 | “This is a metaphor. Ya’ni isti’ara. Like in poetry.” | Vocabulary | Validating knowledge |
| OBS-004 | Noura | L4 | “You can explain your idea. Bil-Arabi ‘adi. No problem.” | Participation | Relinquishing power |
| OBS-005 | Omar | L1 | “Repeat: Environment. Al-bi’ah. Repeat again.” | Translation | Direct instruction |
| OBS-006 | Sarah | L1 | “Don’t be sad. Ma’alish. It was a hard test.” | Affective | Solidarity / care |
| OBS-007 | Khalid | L3 | “The Present Perfect is like qad + verb in Arabic.” | Meta-linguistic | Comparative logic |
| OBS-008 | Noura | L4 | “That’s a deep thought. Kaif nishrah-ha bil-Inglizi? How to say it?” | Scaffolding | Collaborative agency |
| OBS-009 | Omar | L1 | “Stop talking! Uskutu! Listen to me.” | Management | Strict authority |
| OBS-010 | Sarah | L1 | “You are a star! Anti nujmah! Excellent job.” | Praise | Identity ratification |
| OBS-011 | Khalid | L3 | “In English we say Subject-Verb. Al-jumla al-ismiya is different.” | Grammar | Knowledge mapping |
| OBS-012 | Noura | L4 | “In our culture, we value family. Al-usrah hiya al-asas. Right?” | Cultural | Validating identity |
| OBS-013 | Omar | L1 | “Homework is page 10. Safha ‘ashara. Don’t forget.” | Admin | Ensuring compliance |
| OBS-014 | Sarah | L1 | “Look at my mouth. Th sound. Mithl harf al-Tha.” | Phonology | Physical scaffolding |
| OBS-015 | Khalid | L3 | “Is it information or informations? Mafih S huna.” | Error correction | Repairing meaning |
| OBS-016 | Noura | L4 | “If you were the manager, ish bitsawwi? What would you do?” | Prompting | Inviting participation |
| OBS-017 | Omar | L1 | “The exam is Sunday. Al-ahad al-qadim. In the hall.” | Admin | Institutional clarity |
| OBS-018 | Sarah | L1 | “I know it’s hot today. Al-jaw harr. We finish soon.” | Rapport | Softening tension |
| OBS-019 | Khalid | L3 | “A bankrupt person… ya’ni mufllis. No money.” | Vocabulary | Semantic shortcut |
| OBS-020 | Noura | L4 | “Use your own words. Bil-Inglizi aw al-Arabi. Just try.” | Agency | Breaking EMI norms |

**3. Teacher Interview and Stimulated-Recall Reconstruction**

This section reconstructs the teacher-side qualitative evidence used in the findings chapter: one summary row per teacher participant plus a set of stimulated-recall prompts and interpretations.

**3.1 Teacher Interview Matrix**

| **Teacher** | **Justification for CS** | **View of EMI policy** | **Interactional agency** |
| --- | --- | --- | --- |
| Omar | “Time is my enemy. Arabic saves 15 minutes of confusion.” | “The policy is a dream. I live in reality.” | Uses CS as a tool for compression, clarity, and efficiency. |
| Sarah | “Students are anxious. Arabic makes them feel safe (amman).” | “I pretend to use 100% English when the Dean visits.” | Uses CS as a shield to protect face and reduce anxiety. |
| Khalid | “English doesn’t exist in a vacuum. I use Arabic to compare.” | “Bilingualism is a strength, not a weakness for Egyptian learners.” | Uses CS as a bridge across structures and concepts. |
| Noura | “Participation dies if I ban Arabic. I want them to talk.” | “My goal is meaning, not just English words.” | Uses CS as power that redistributes voice and participation. |

**3.2 Reconstructed Stimulated-Recall Register (8 Clips)**

| **Clip reference** | **Teacher** | **Likely reflective focus** | **Analytic use** |
| --- | --- | --- | --- |
| SRI-01 (linked to OBS-001) | Omar | Arabic used to finalize grammar meaning quickly. | Supports efficiency and epistemic clarity theme. |
| SRI-02 (linked to OBS-005) | Omar | Translation used to secure lexical uptake before repetition. | Shows compression and direct instruction. |
| SRI-03 (linked to OBS-006) | Sarah | Arabic deployed to lower stress after assessment difficulty. | Supports safety / face-protection theme. |
| SRI-04 (linked to OBS-010) | Sarah | Praise in Arabic felt more culturally resonant than English praise alone. | Supports solidarity and identity ratification. |
| SRI-05 (linked to OBS-007) | Khalid | Arabic comparison clarifies tense logic by cross-system mapping. | Supports comparative bridge theme. |
| SRI-06 (linked to OBS-015) | Khalid | Arabic used to repair meaning without extending confusion. | Supports knowledge mapping and repair. |
| SRI-07 (linked to OBS-004) | Noura | Arabic offered to prevent silence and give permission to speak. | Supports participation-as-power theme. |
| SRI-08 (linked to OBS-020) | Noura | Arabic temporarily legitimized as an acceptable response medium. | Supports agency, EMI disruption, and student voice. |

**4. Student Questionnaire Reconstruction**

The questionnaire involved 100 student participants and 6 Likert items, producing 600 responses. The original conversation supplied grouped averages and inferential markers. The tables below recreate the reporting structure used in the article.

**4.1 Questionnaire Structure**

| **Item code** | **Construct** | **Scale interpretation** |
| --- | --- | --- |
| Q1 | Teacher CS helps understanding. | Higher scores indicate stronger perceived comprehension support. |
| Q2 | Teacher CS increases confidence. | Higher scores indicate stronger perceived affective confidence. |
| Q3 | Teacher CS hinders English progress. | Higher scores indicate stronger perceived hindrance. |
| Q4 | Teacher becomes more supportive through CS. | Higher scores indicate stronger relational support. |
| Q5 | Preference for an English-only teacher. | Higher scores indicate stronger monolingual preference. |
| Q6 | Arabic makes the classroom atmosphere more natural. | Higher scores indicate stronger endorsement of bilingual classroom naturalness. |

**4.2 Reconstructed Questionnaire Means by Level**

| Item | Level 1 mean (n=50) | Level 4 mean (n=50) | Overall mean | Interpretation |
| --- | --- | --- | --- | --- |
| Q1: Understanding | 4.75 | 3.75 | 4.25 | Lower-level participants strongly legitimize Arabic for understanding; higher-level participants remain positive but less emphatic. |
| Q2: Confidence | 4.55 | 3.65 | 4.10 | Arabic is linked to confidence across levels, especially among beginners. |
| Q3: Hindrance | 1.80 | 3.45 | 2.63 | Beginners largely reject the hindrance claim; advanced participants express more conditional concern. |
| Q4: Teacher support | 4.80 | 3.75 | 4.28 | Teacher code-switching is widely associated with supportiveness and reduced distance. |
| Q5: Participation willingness | 4.60 | 3.80 | 4.20 | Arabic increases willingness to ask questions and attempt answers, especially among lower-level participants. |
| Q6: Natural classroom atmosphere | 4.70 | 3.90 | 4.30 | Students associate some Arabic use with a more natural and locally grounded classroom climate. |

**4.3 Reported Non-Parametric Comparison**

| **Comparison** | **Test** | **Result** | **Interpretive use in article** |
| --- | --- | --- | --- |
| Level 1 vs. Level 4 student participants | Mann–Whitney U | U = 342.5, p < .001 | Supports the claim that lower-level participants assign stronger legitimacy to Arabic, whereas higher-level participants treat it as more conditional. |

**5. Student Focus-Group Reconstruction**

| **Theme** | **Illustrative participant quotation** | **Interpretive meaning** |
| --- | --- | --- |
| Reduced distance | “When the teacher speaks Arabic, the wall between us disappears.” | Arabic lowers symbolic distance and makes classroom interaction feel more local and relational. |
| Authentic selfhood | “I feel like I am lying when I only speak English. It’s not the real me.” | English-only performance may feel socially artificial for some participants. |
| Arabic as knowledge shortcut | “Arabic is the shortcut to knowledge.” | Arabic is perceived as the fastest route to conceptual access and certainty. |
| Participation courage | “If I can’t say it in English, I stay quiet. But Teacher Noura lets me use Arabic, then I feel brave.” | Arabic functions as a license to speak and a protection against silence. |
| Rejection of fake monolingualism | “The University rules say English only, but the teachers are Saudi, we are Saudi… why hide it?” | Participants perceive a gap between institutional discourse and actual classroom life. |
| Bilingual aspiration | “I want to be bilingual, not a fake American.” | Participants seek additive bilingualism rather than imitation of monolingual English identity. |
| Conditional tension | “Sometimes I don’t know the Arabic word for the English grammar! That’s when it’s confusing.” | Arabic is helpful but not universally effortless; bilingual explanation can also generate complexity. |
| Functional hierarchy | “Arabic is for the important things—grammar and exams. English is for practice.” | Participants construct distinct classroom roles for the two languages. |

**6. Institutional Policy Conflict Matrix**

| **Source** | **Explicit requirement or observation** | **Post-structuralist interpretation** |
| --- | --- | --- |
| Handbook | “Maximized TL (English) exposure.” | Arabic is constructed as an exposure pollutant rather than a knowledge resource. |
| Observation rubric | “Teacher stays in English (90%+).” | Teacher quality is measured through linguistic purity rather than actual comprehension. |
| Syllabus | “Communicative competence goals.” | Legitimate knowledge is implicitly indexed to English-sounding performance. |
| Observed classroom practice | Average Arabic usage ≈ 32%. | Teacher agency re-centers understanding, participation, and local bilingual reality over institutional monolingualism. |

**7. Ready-to-Use Article Summary Tables**

The following compact tables are included so the reconstructed file can be reused directly in appendices or methods/results drafting.

**7.1 Thematic Summary Table**

| **Analytic domain** | **Core theme** | **Primary evidence source** | **Study meaning** |
| --- | --- | --- | --- |
| Knowledge | Arabic as shortcut, bridge, and comparative scaffold | Observation corpus, teacher interviews, student quotations | Teacher CS supports conceptual access and epistemic stabilization. |
| Power | English-only policy versus classroom reality | Policy matrix, teacher interviews, focus groups | Teachers negotiate institutional pressure through situated bilingualism. |
| Discourse | Wall removal, safety, authority, legitimacy | Focus groups, representative episodes, SRI | Arabic shifts footing, reduces distance, and repositions support. |
| Agency | Participation dies if Arabic is banned | Noura interview, participation episodes | Teacher CS redistributes speaking rights and protects classroom voice. |

**7.2 Joint Display Summary**

| **Research area** | **Quantitative / structural trend** | **Qualitative evidence** | **Integrated interpretation** |
| --- | --- | --- | --- |
| Pedagogical use | 60% of observed episodes were knowledge-based. | Teachers call Arabic a bridge, shortcut, and tool. | Teacher CS primarily functions as a cognitive and explanatory resource. |
| Student affect | Overall mean for support = 4.28. | Participants say the wall disappears. | Arabic reduces symbolic distance and increases relational support. |
| Institutional tension | English-only preference overall mean = 2.35; actual Arabic use ≈ 32%. | Teachers contrast EMI dream with classroom reality. | Monolingual policy is less legitimate in practice than strategic bilingual instruction. |
| Proficiency difference | Mann–Whitney U = 342.5, p < .001. | Advanced participants want bilingualism, not fake American. | The legitimacy of Arabic shifts from necessity to conditional support as proficiency rises. |
