# Supplementary material
Source: Research Square preprint supplement (doi:10.21203/rs.3.rs-9358539/v1)
Supplement: Supplementary file 2 [file e51538eaa81cf2ec7f0c883d.docx]

**Appendices: Research Instruments
The Pedagogical and Discursive Functions of Teacher Code-Switching in Beni-Suef University EFL Classrooms**

# Appendix A. Instrument Set Overview

| **Instrument** | **Primary purpose** | **Main data source** |
| --- | --- | --- |
| Classroom observation and recording protocol | Capture naturally occurring teacher code-switching episodes and classify their pedagogical and discursive functions | Observed lessons with field notes |
| Semi-structured teacher interview guide | Elicit beliefs, justifications, and perceptions of policy and practice | Teacher interviews |
| Stimulated-recall interview protocol | Explore the teacher’s situated reasoning during selected code-switching episodes | Post-lesson interview clips |
| Student perception questionnaire | Collect structured student perceptions of comprehension, confidence, and engagement | Questionnaire responses |
| Student focus group guide | Deepen understanding of classroom atmosphere and bilingual participation | Student group discussion |
| Institutional document analysis checklist | Compare official discourse with classroom practice | Policies, rubrics, and syllabi |

# Appendix B. Classroom Observation and Recording Protocol

Objective: To capture naturally occurring teacher code-switching and identify its pedagogical and discursive functions in relation to Research Questions 1 and 2.

| **Time / episode** | **Code-switching type** | **Pedagogical function** | **Discursive / interactional move** | **Multimodal cues** |
| --- | --- | --- | --- | --- |
| [Timestamp] | Inter-sentential / Intra-sentential / Tag | Grammar explanation / Translation / Management / Rapport / Vocabulary clarification / Phonology / Error repair / Cultural grounding / Admin clarity / Prompting | Asserting authority / Softening correction / Validating response / Repairing misunderstanding / Inviting participation / Relinquishing power / Identity ratification / Institutional clarity / Collaborative agency | Gesture, eye contact, writing on board, intonation shift |
| [Timestamp] |  |  |  |  |
| [Timestamp] |  |  |  |  |

## Field notes focus:

- Institutional presence: note any visible signs of English-only or EMI pressure, such as posters, rules, or teacher comments.
- Trigger event: note what immediately preceded the switch to Arabic, for example a pause, a puzzled facial expression, a student question, or failed comprehension.
- The return: note how the teacher signals the shift back to English and whether the return is explicit or gradual.

# Appendix C. Semi-Structured Teacher Interview Guide

Objective: To explore teacher beliefs, professional agency, and institutional mediation in relation to code-switching (Research Questions 3 and 5).

## Part A. Professional Context and Agency

1. Can you describe your professional background and your own experience as an English learner in Egypt?
2. How would you describe the official or expected policy regarding the use of Arabic in this university’s EFL classrooms?
3. To what extent do you feel free to use Arabic when you believe it is necessary?

## Part B. Pedagogical Justification

1. In what specific classroom situations do you find yourself switching to Arabic most often?
2. Are there particular grammatical, lexical, or cultural concepts that you feel need to be explained in Arabic? Why?
3. How do you decide when a student or a class has reached the limit of English-only comprehension and requires Arabic support?

## Part C. Discursive and Institutional Mediation

1. Do you think using Arabic sometimes softens authority, builds a bridge with students, or changes the atmosphere of the class? Please explain.
2. Do you ever feel that using Arabic may appear unprofessional in front of observers, supervisors, or administrators? Why or why not?
3. How do you balance institutional expectations for English-medium teaching with your own judgement about what students need?

# Appendix D. Stimulated-Recall Interview Protocol

Objective: To obtain insider explanations of selected code-switching episodes observed in recorded lessons (Research Questions 2 and 3).

## Procedure

1. Select three to five short lesson clips that contain salient teacher code-switching episodes.
2. Begin the session with approximately two minutes of warm-up playback to reactivate lesson context.
3. Pause at each selected episode and ask the teacher to explain what they were trying to accomplish at that moment.

## Prompting questions

- At this moment you switched to Arabic to explain [Concept X]. What was going through your mind regarding the students’ understanding at that second?
- In this clip, you used an Arabic phrase immediately after a student made a mistake. What was the purpose of that shift?
- Was this switch intended mainly for explanation, affective support, discipline, face-saving, or another purpose?
- If an administrator had been in the room during this specific switch, would you still have made it? Why or why not?

# Appendix E. Student Perception Questionnaire

Objective: To gather quantitative and qualitative data on how students perceive the impact of teacher code-switching on learning and engagement (Research Question 4).

Instructions to students (Arabic administration version): اقرأ العبارات التالية وحدد درجة موافقتك على كل عبارة. مقياس الاستجابة هو: 1 = أعارض بشدة، 2 = أعارض، 3 = محايد، 4 = أوافق، 5 = أوافق بشدة.

| **Item** | **Response scale** |
| --- | --- |
| 1. عندما يشرح المعلم القواعد الصعبة بالعربية، أفهمها بسرعة أكبر. | 1 2 3 4 5 |
| 2. أشعر بثقة أكبر في الصف عندما أعلم أن المعلم سيستخدم العربية لتوضيح النقاط الصعبة. | 1 2 3 4 5 |
| 3. كثرة استخدام العربية في الصف تجعلني أشعر أنني لا أمارس الإنجليزية بما يكفي. | 1 2 3 4 5 |
| 4. عندما ينتقل المعلم إلى العربية، أشعر أنه أقرب إلينا كطلاب. | 1 2 3 4 5 |
| 5. أكون أكثر استعداداً للمشاركة أو طرح الأسئلة عندما يسمح المعلم ببعض العربية. | 1 2 3 4 5 |
| 6. استخدام العربية يجعل بيئة الصف أكثر طبيعية للطلاب في جامعة بني سويف. | 1 2 3 4 5 |

## Open-ended item

Describe a time when your teacher switched to Arabic and it really helped you understand a concept. What do you think would have happened if the teacher had stayed in English only?

# Appendix F. Student Focus Group Discussion Guide

Objective: To explore students’ perceptions of classroom atmosphere, participation, and the role of Arabic in English lessons (Research Questions 4 and 5).

1. Does it feel wrong or right when a teacher uses Arabic in an English class? Why?
2. How does the energy or atmosphere of the class change when the teacher switches from English to Arabic?
3. Do you think an effective English teacher should use zero Arabic? Why or why not?
4. Does the use of Arabic make the class feel more inclusive, more relaxed, more serious, or less challenging? Explain.

# Appendix G. Institutional Document Analysis Checklist

Objective: To identify the official discourse concerning language use and compare it with actual classroom practice (Research Question 5).

## Document types to collect

- Course syllabi
- Departmental handbooks
- Faculty evaluation rubrics
- University language policy statements
- Teacher observation forms or quality-assurance documents

## Keywords to scan for

- English-only
- Target language
- L1 use
- Arabic use
- Monolingual
- Medium of instruction
- Prohibited
- Restricted
- Resource
- Support

## Analysis questions

1. Is there explicit discouragement or formal penalty for L1 use in teaching or evaluation?
2. Is Arabic framed as a resource, a tolerated support mechanism, or a hindrance?
3. How is valid classroom knowledge represented? Must it be expressed in English to count as academically legitimate?
4. Do the documents allow for teacher discretion or strategic use of Arabic in difficult instructional situations?

# Appendix H. Instrument Validation and Trustworthiness Summary

This summary consolidates the expert review, pilot study, and trustworthiness procedures reported in the methodology chapter.

| **Metric** | **Technique applied** | **Result / outcome** |
| --- | --- | --- |
| Content validity | Panel of 3 Egyptian university EFL experts | Revised 4 questions; student tools translated into Arabic; interview prompts made less leading. |
| Questionnaire reliability | Pilot study (Cronbach’s alpha) | Comprehension/learning subscale (Items 1, 3, 6) α = .82; engagement/discourse subscale (Items 2, 4, 5) α = .78; overall six-item reliability ≈ .80. |
| Inter-rater reliability | Independent coding of pilot video | 85% agreement; refined definitions of authority vs. scaffolding. |
| Credibility | Member checking | Participants reviewed transcripts and commented on the interpretation of their intentions. |
| Confirmability | Methodological and theoretical triangulation | Cross-referenced multiple data sources and analytic lenses to reduce researcher bias. |
